# Supplementary material
Source: PubMed Central journal article supplement (PMC8832929)
Supplement: tpmd210618.SD1.pdf [file tpmd210618.SD1.pdf]

**Supplemental Table – 1 Summary of the investigations**

|                                      | D3   | D4   | D5<br>Morning | D5<br>Evening | D6<br>Morning | D6<br>Evening | D7   | D8   | D17 On<br>discharge |
|--------------------------------------|------|------|---------------|---------------|---------------|---------------|------|------|---------------------|
| WBC ( x<br>10 <sup>3</sup> /uL)      | 3.38 | 3.35 | 3.33          | 4.81          | 6.48          | 8             | 8.48 | 11.2 | 10.9                |
| Hb (g/dL)                            | 14.7 | 15   | 16.4          | 18            | 16.9          | 15.8          | 15.3 | 14.9 | 15.2                |
| PCV (%)                              | 42   | 43   | 47            | 54.4          | 49.1          | 46.37         | 47.4 | 42.8 |                     |
| Platelets (x<br>10 <sup>3</sup> /uL) | 44   | 32   | 18            | 12            | 10            | 16            | 40   | 61   | 278                 |
| Total protein<br>(g/dL)              |      | 6.3  |               |               |               |               |      |      | 6.63                |
| Albumin<br>(g/dL)                    |      | 3.7  |               |               |               |               |      |      | 3.3                 |
| Globulin<br>(g/dL)                   |      | 2.6  |               |               |               |               |      |      |                     |
| Total bilirubin<br>(mmol/L)          |      | 7    |               |               |               |               |      |      | 11.49               |
| Direct<br>bilirubin<br>(mmol/L)      |      | 1.07 |               |               |               |               |      |      | 2.1                 |
| ALP (u/L)                            |      | 120  |               |               |               |               |      |      |                     |
| GGT (u/L)                            |      | 55   |               |               |               |               |      |      |                     |
| AST (u/L)                            |      | 119  |               | 265           |               |               |      | 160  | 73                  |
| ALT (u/L)                            |      | 94   |               | 347           |               |               |      | 167  | 40                  |
| Creatinine<br>(mmol/L)               |      | 92   |               |               |               |               |      |      | 71                  |
| Sodium<br>(mmol/L)                   |      | 134  |               |               |               |               |      |      | 134                 |
| Potassium<br>(mmol/L)                |      | 3.7  |               |               |               |               |      |      | 4.3                 |
| CRP (mg/L)                           |      | 10.9 |               |               |               |               |      |      | 15.2                |
| Urinalysis –<br>pus cells            |      | nil  |               |               |               |               |      |      |                     |

|                                    |  |                                                                                                                                                                                                                  |  |     |  |  |    |  |      |
|------------------------------------|--|------------------------------------------------------------------------------------------------------------------------------------------------------------------------------------------------------------------|--|-----|--|--|----|--|------|
| RBC                                |  | nil                                                                                                                                                                                                              |  |     |  |  |    |  |      |
| Protein                            |  | nil                                                                                                                                                                                                              |  |     |  |  |    |  |      |
| PT (sec)                           |  | 13.0                                                                                                                                                                                                             |  |     |  |  |    |  | 10   |
| INR                                |  | 1.02                                                                                                                                                                                                             |  |     |  |  |    |  | 0.98 |
| APTT (sec)                         |  | 22                                                                                                                                                                                                               |  |     |  |  |    |  |      |
| ESR (mm/1 <sup>st</sup> hour)      |  | 05                                                                                                                                                                                                               |  |     |  |  | 04 |  |      |
| NS – 1 Ag                          |  | +ve                                                                                                                                                                                                              |  |     |  |  |    |  |      |
| Dengue IgM antibody                |  |                                                                                                                                                                                                                  |  | +ve |  |  |    |  |      |
| Total cholesterol (mg/dl)          |  | 152                                                                                                                                                                                                              |  |     |  |  |    |  |      |
| FBS (mg/dl)                        |  | 198                                                                                                                                                                                                              |  |     |  |  |    |  |      |
| HbA1C                              |  | 6.7%                                                                                                                                                                                                             |  |     |  |  |    |  |      |
| ECG                                |  | Sinus rhythm. No ischaemic changes                                                                                                                                                                               |  |     |  |  |    |  |      |
| 2D-echocardiogram                  |  | Normal study. No cardiac source of thromboembolism                                                                                                                                                               |  |     |  |  |    |  |      |
| MRI brain with MRA/MRV             |  | T2 and FLAIR high intensity area with mild diffusion restriction and peripheral enhancement noted in the right thalamus, suggestive of sub-acute right thalamic infarction<br>No abnormality detected on MRA/MRV |  |     |  |  |    |  |      |
| Carotid doppler                    |  | Normal study                                                                                                                                                                                                     |  |     |  |  |    |  |      |
| Ultrasound scan of abdomen and KUB |  | Normal study                                                                                                                                                                                                     |  |     |  |  |    |  |      |

**Supplemental Table 2 - Timeline of important clinical events**

| <b>Day of illness</b>    | <b>Platelet count (u/L)</b> | <b>Haematocrit (%)</b>            | <b>Clinical status</b>                                 |                                                                                                                                                    |
|--------------------------|-----------------------------|-----------------------------------|--------------------------------------------------------|----------------------------------------------------------------------------------------------------------------------------------------------------|
|                          |                             |                                   | <b>Dengue fever</b>                                    | <b>Stroke</b>                                                                                                                                      |
| Day 3 (Day of admission) | 44,000                      | 42.0 (Capillary PCV on admission) | Pre-critical monitoring started                        | Left upper limb and lower limb power MRC grade 4/5. Able to mobilize on his own. NIHSS score 3.                                                    |
| Day 4                    | 32,000                      | 43.0                              | Pre-critical phase management continued                | As above                                                                                                                                           |
| Day 5                    | 12,000                      | 54.4                              | Dengue leaking scan positive<br>Critical phase started | Left upper limb and lower limb power MRC grade 3/5. Needs support to mobilize                                                                      |
| Day 7                    | 40,000                      | 47.4                              | Critical phase ended.                                  | Mobilizing with support                                                                                                                            |
| Day 10                   | 190,000                     | 44.2                              | Recovery phase with a clear increase in platelet count | Transferred to stroke unit for further management.                                                                                                 |
| Day 11                   | 268,00                      | 43.8                              | Recovered                                              | Started on anti-platelets, statin and multi-disciplinary rehabilitation.<br><br>Left upper limb and lower limb power MRC grade 3/5. NIHSS score 5. |
| Day 17                   | 278,000                     |                                   | Discharged. No further complications.                  | Left upper limb and lower limb power MRC grade 4/5. Able to mobilize independently<br>NIHSS score 3.                                               |

**Supplemental Table 3. Summary table of previous publications of ischemic stroke in dengue**

| <b>Author, Year; Reference</b> | <b>Age/ Sex</b> | <b>Key clinical features</b>                 | <b>Key neuroimaging findings - on CT/MRI</b>                         | <b>Outcome</b>         |
|--------------------------------|-----------------|----------------------------------------------|----------------------------------------------------------------------|------------------------|
| Seet & Lim, 2006; [27]         | 43y, male       | Dysarthria-clumsy hand syndrome              | Haemorrhagic infarction in corona radiata, putamen, external capsule | Complete recovery      |
| Liou et al., 2008; [25]        | 59y, male       | Hemiparesis                                  | Thalamic lacunar infarct                                             | Near complete recovery |
| Mathew & Pandian, 2010; [5]    | 70y, female     | Hemiparesis                                  | Infarct in the right parietal lobe                                   | Near complete recovery |
| Verma et al., 2013; [13]       | 68y, male       | Hemiparesis                                  | Infarct in the right parietal region                                 | Partial recovery       |
| Nanda et al., 2014 [30]        | 8y, female      | Hemiparesis, visual impairment               | Multiple infarctions in anterior & posterior circulation             | Complete recovery      |
| Manappalli, 2016; [26]         | 86y, male       | Hemiparesis                                  | Multiple lacunar infarcts in pons                                    | Death (day 7)          |
| Yoganathan et al., 2017; [34]  | 29 months, male | Altered consciousness, seizures, hemiparesis | Multiple infarcts in pons & centrum semiovale                        | Near complete recovery |
| Herath et al, 2018; [35]       | 53y, female     | Dysarthria, ataxia, hemiparesis              | Multiple infarcts in pons & medulla                                  | Complete recovery      |
| Estofolete et al, 2020; [36]   | 38y, female     | Disoriented, seizures, decerebrate posturing | Multiple infarctions in cerebellum, thalamus & temporal lobe         | Partial recovery       |
| Current case, 2021             | 52y, male       | Hemiparesis                                  | Thalamic lacunar infarct                                             | Complete recovery      |
